# Supplementary material for: Coupling of chalcocarbonyl ligands (CE: E = S, Se, Te) on an iron carbonyl site: effect of the chalcogen
Source: Royal Society of Chemistry journal article supplement (doi:10.1039/c3cc40822a), 2013-01-01
Supplement: c3cc40822a.pdf [file c3cc40822a.pdf]

**Supporting Information**

---

**Coupling Reactions of Carbon  
Monochalcogenide Ligands on an Iron Carbonyl  
Site: Effect of the Chalcogen**

Zhong Zhang,\*<sup>a</sup> Liang Pu,<sup>a</sup> and R. Bruce King\*<sup>b</sup>

<sup>a</sup> College of Science, Northwest A&F University, Yangling, Shanxi 712100, P. R.  
China

<sup>b</sup> Department of Chemistry and Center for Computational Chemistry, University of  
Georgia, Athens, Georgia 30602, USA

Supporting Information:

Theoretical Methods

$\text{Fe}(\text{CO})_4(\text{CE})_2$

$\text{Fe}(\text{CO})_3(\text{CE})_2$

$\text{Fe}(\text{CO})_2(\text{CE})_2$

Thermochemistry

Orbital Interactions

## Supporting Information

---

### 1. Theoretical Methods

Electron correlation effects were considered using density functional theory (DFT) methods, which have evolved as a practical and effective computational tool, especially for organometallic compounds.<sup>1,2,3,4,5,6,7,8,9,10,11,12,13,14,15,16</sup> The popular B3LYP method, which is the hybrid HF/DFT method using a combination of the three-parameter Becke exchange functional (B3) with the Lee-Yang-Parr (LYP) generalized gradient correlation functional,<sup>17,18</sup> was used in this study.

Basis sets have been chosen to provide continuity with a body of existing research on organometallic compounds. Fortunately, DFT methods are less basis set sensitive than higher-level methods such as coupled cluster theory. In this work all computations were performed using double- $\zeta$  plus polarization (DZP) basis sets. The DZP basis sets used for carbon, oxygen, and sulfur add one set of pure spherical harmonic d functions with orbital exponents  $\alpha_d(\text{C}) = 0.75$ ,  $\alpha_d(\text{O}) = 0.85$ , and  $\alpha_d(\text{S}) = 0.70$  to the standard Huzinaga-Dunning contracted DZ sets.<sup>19,20,21</sup> The Ahlrichs' DZP basis set<sup>22</sup> for Se atom was designated (14s10p5d/8s6p3d). The loosely contracted DZP basis set for iron is the Wachters primitive set<sup>23</sup> augmented by two sets of p functions and one set of d functions, contracted following Hood, Pitzer and Schaefer,<sup>24</sup> and designated (14s11p6d/10s8p3d). The effective core potential (ECP) basis sets Lanl2DZ<sup>25,26</sup> has been used for Te atom as designated (3s3p/2s2p) for valence orbitals.

The geometries of all structures were fully optimized using the B3LYP/DZP method. Vibrational frequencies were determined by evaluating analytically the second derivatives of the energy with respect to the nuclear coordinates. All of the computations were carried out with the Gaussian 09 program,<sup>27</sup> exercising the fine grid option (75 radial shells, 302 angular points) for evaluating integrals numerically,<sup>28</sup> while the tight ( $10^{-8}$  hartree) designation is the default for the self-consistent field (SCF) convergence.

The optimized structures are depicted in Figures S1 to S3. Each  $\text{Fe}(\text{CE})_2(\text{CO})_n$  ( $\text{E} = \text{S}, \text{Se}, \text{Te}; n = 4, 3, 2$ ) structure is designated as **nE-x** where **n** is the number of CO groups, **E** is the chalcogen ( $\text{C}_2\text{E}_2$ )/(CE)<sub>2</sub> molecule(s), and **x** represents the binding mode in Scheme 2. Triplet structures are indicated by **T**. Thus the singlet  $\eta^2$ -E-C bonded structure of  $\text{Fe}(\text{CS})_2(\text{CO})_4$  is designated **4S-a**.

## Supporting Information

### 2. Results

#### 2.1 $\text{Fe}(\text{CO})_4(\text{CE})_2$

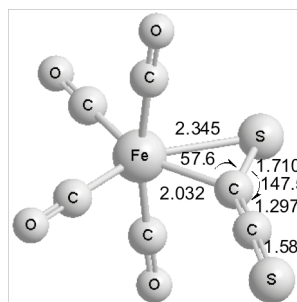

**4S-a**( $C_s$ , 0.0)

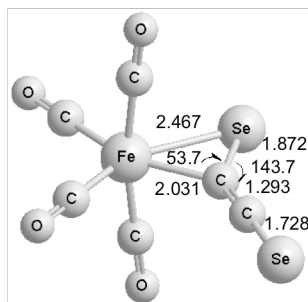

**4Se-a**( $C_s$ , 0.0)

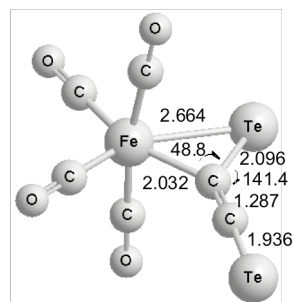

**4Te-a**( $C_s$ , 0.0)

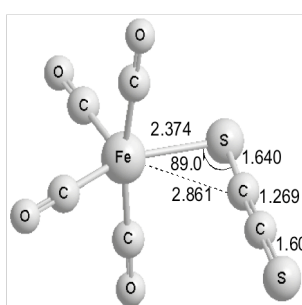

**4S-aT**( $C_s$ , 10.2)

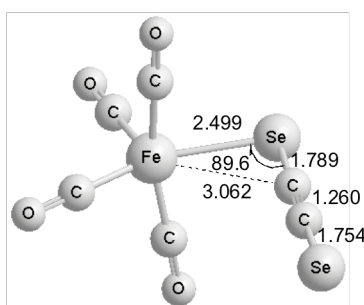

**4Se-aT**( $C_s$ , 10.1)

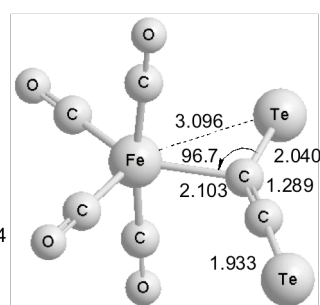

**4Te-aT**( $C_s$ , 11.4)

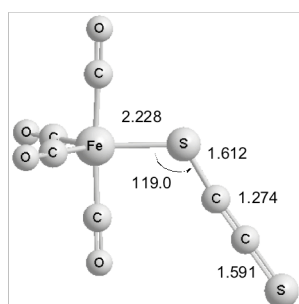

**4S-b**( $C_s$ , 13.5)

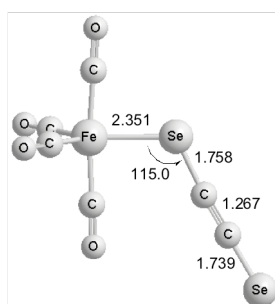

**4Se-b**( $C_s$ , 14.0)

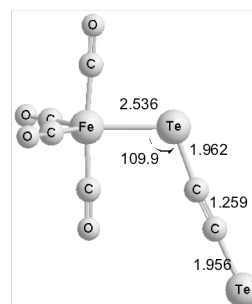

**4Te-b**( $C_s$ , 13.5)

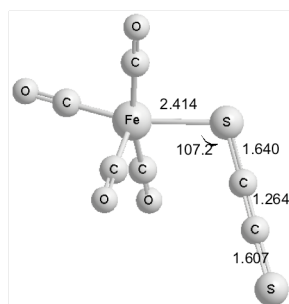

**4S-bT**( $C_1$ , 12.9)

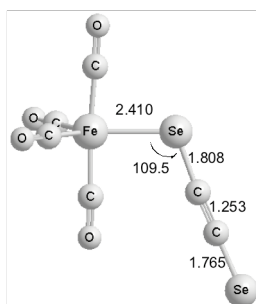

**4Se-dT**( $C_s$ , 14.2)

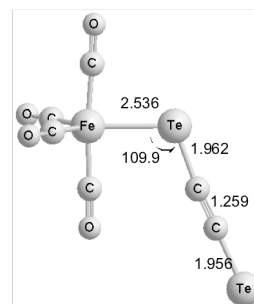

**4Te-d**( $C_s$ , 13.5)

## Supporting Information

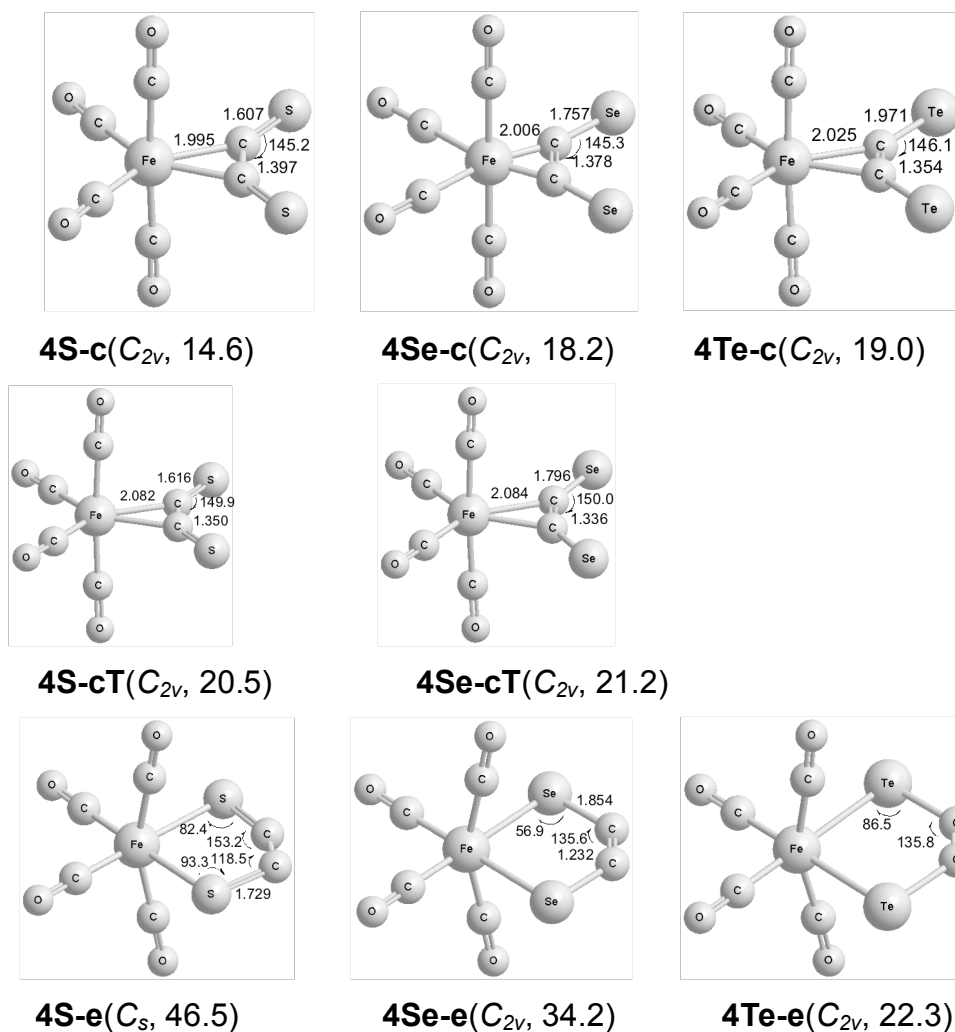

**Figure S1.** Twenty optimized  $\text{Fe}(\text{CO})_4(\text{CE})_2$  ( $E = \text{S}, \text{Se}, \text{Te}$ ). From Fig. S1 to Fig. S3, symmetry and relative energies (unit in kcal/mol) were given in parentheses. All of these structures were found to be genuine minima without any vibrational frequencies.

**Table S1.** The total energies ( $E$ , in Hartree), relative energies ( $\Delta E$ , in kcal/mol), and spin contamination ( $\langle S^2 \rangle$ ) for the optimized  $\text{Fe}(\text{CO})_4(\text{CS})_2$  structures.

|                       | <b>4S-a</b> | <b>4S-aT</b> | <b>4S-b</b> | <b>4S-bT</b> | <b>4S-c</b> | <b>4S-cT</b> | <b>4S-d</b> |
|-----------------------|-------------|--------------|-------------|--------------|-------------|--------------|-------------|
| $-E$                  | 2589.7642   | 2589.7480    | 2589.7428   | 2589.7436    | 2589.7409   | 2589.7316    | 2589.6901   |
| $\Delta E$            | 0.0         | 10.2         | 13.5        | 12.9         | 14.6        | 20.5         | 46.5        |
| $\langle S^2 \rangle$ | 0.00        | 2.04         | 0.00        | 2.00         | 0.00        | 2.02         | 0.00        |

**Table S2.** The total energies ( $E$ , in Hartree), relative energies ( $\Delta E$ , in kcal/mol), and spin contamination ( $\langle S^2 \rangle$ ) for the optimized  $\text{Fe}(\text{CO})_4(\text{CSe})_2$  structures.

|                       | <b>4Se-a</b> | <b>4Se-aT</b> | <b>4Se-b</b> | <b>4Se-bT</b> | <b>4Se-c</b> | <b>4Se-cT</b> | <b>4Se-d</b> |
|-----------------------|--------------|---------------|--------------|---------------|--------------|---------------|--------------|
| $-E$                  | 6596.4546    | 6596.4386     | 6596.4323    | 6596.4320     | 6596.4256    | 6596.4208     | 6596.4001    |
| $\Delta E$            | 0.0          | 10.1          | 14.0         | 14.2          | 18.2         | 21.2          | 34.2         |
| $\langle S^2 \rangle$ | 0.00         | 2.03          | 0.00         | 2.05          | 0.00         | 2.02          | 0.00         |

## Supporting Information

**Table S3.** The total energies ( $E$ , in Hartree), relative energies ( $\Delta E$ , in kcal/mol), and spin contamination ( $\langle S^2 \rangle$ ) for the optimized  $\text{Fe}(\text{CO})_4(\text{CTe})_2$  structures.

| CTe                   | 4Te-a     | 4Te-aT    | 4Te-b     | 4Te-bT    | 4Te-c     | 4Te-cT    | 4Te-d     |
|-----------------------|-----------|-----------|-----------|-----------|-----------|-----------|-----------|
| $E$                   | 1809.4805 | 1809.4623 | 1809.4651 | 1809.4589 | 1809.4502 | 1809.4483 | 1809.4449 |
| $\Delta E$            | 0.0       | 11.4      | 9.6       | 13.5      | 19.0      | CTe-TseT  | 22.3      |
| $\langle S^2 \rangle$ | 0.00      | 2.04      | 2.04      | 0.00      | 0.00      | 2.01      | 0.00      |

### 2.2 $\text{Fe}(\text{CO})_3(\text{CE})_2$

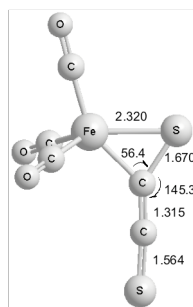

**3S-aT**( $C_s$ , 0.0)

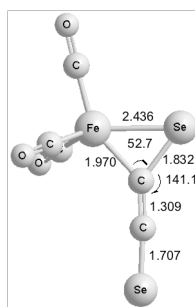

**3Se-aT**( $C_s$ , 0.0)

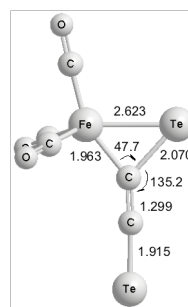

**3Te-aT**( $C_s$ , 0.0)

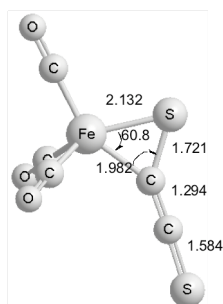

**3S-a**( $C_s$ , 4.9)

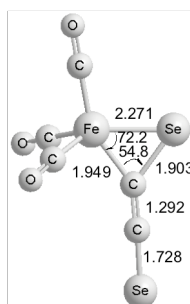

**3Se-a**( $C_s$ , 3.5)

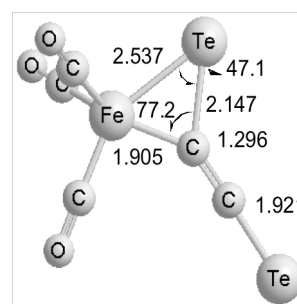

**3Te-a**( $C_s$ , 3.0)

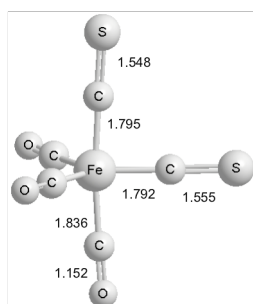

**3S-f**( $C_s$ , 4.4)

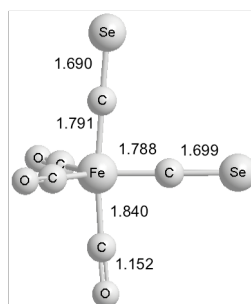

**3Se-f**( $C_s$ , 19.6)

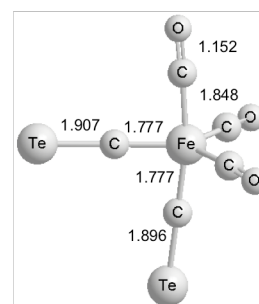

**3Te-f**( $C_s$ , 38.0)

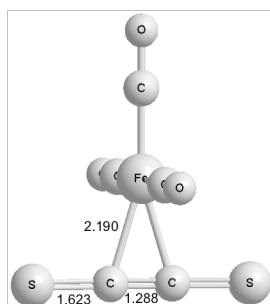

**3S-cT**( $C_{2v}$ , 15.6)

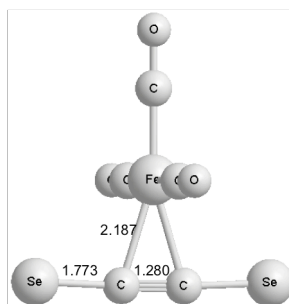

**3Se-cT**( $C_{2v}$ , 13.4)

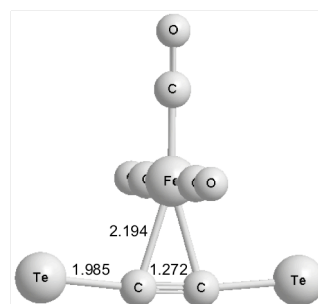

**3Te-cT**( $C_s$ , 8.1)

## Supporting Information

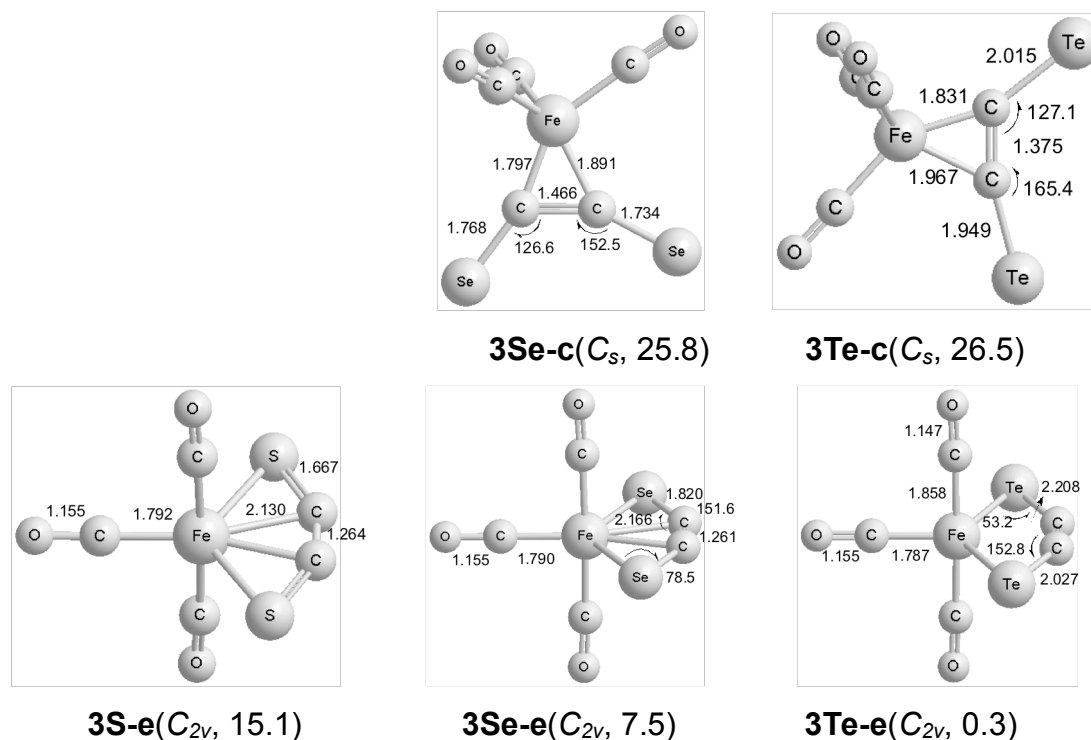

**Figure S2.** Optimized  $\text{Fe}(\text{CO})_3(\text{CE})_2$  ( $\text{E} = \text{S}, \text{Se}, \text{Te}$ ) structures.

**Table S4.** The total energies ( $E$ , in Hartree), relative energies ( $\Delta E$ , in kcal/mol), and spin contamination ( $\langle S \rangle^2$ ) for the optimized  $\text{Fe}(\text{CO})_3(\text{CS})_2$  structures.

|                       | <b>3S-aT</b> | <b>3S-f</b> | <b>3S-a</b> | <b>3S-e</b> | <b>3S-cT</b> |
|-----------------------|--------------|-------------|-------------|-------------|--------------|
| $-E$                  | 2476.4069    | 2476.3999   | 2476.3990   | 2476.3829   | 2476.3725    |
| $\Delta E$            | 0.0          | 4.4         | 4.9         | 15.1        | 21.6         |
| $\langle S \rangle^2$ | 2.04         | 0.00        | 0.00        | 0.00        | 2.05         |

**Table S5.** The total energies ( $E$ , in Hartree), relative energies ( $\Delta E$ , in kcal/mol), and spin contamination ( $\langle S \rangle^2$ ) for the optimized  $\text{Fe}(\text{CO})_3(\text{CSe})_2$  structures.

|                       | <b>3Se-aT</b> | <b>3Se-a</b> | <b>3S-e</b> | <b>3S-eT</b> | <b>3Se-f</b> | <b>3Se-cT</b> | <b>3Se-c</b> |
|-----------------------|---------------|--------------|-------------|--------------|--------------|---------------|--------------|
| $-E$                  | 6483.0951     | 6483.0895    | 6483.0832   | 6483.0737    | 6483.0639    | 6483.0631     | 6483.0540    |
| $\Delta E$            | 0.0           | 3.5          | 7.5         | 13.4         | 19.6         | 20.1          | 25.8         |
| $\langle S \rangle^2$ | 2.04          | 0.00         | 0.00        | 2.04         | 0.00         | 2.03          | 0.00         |

**Table S6.** The total energies ( $E$ , in Hartree), relative energies ( $\Delta E$ , in kcal/mol), and spin contamination ( $\langle S \rangle^2$ ) for the optimized  $\text{Fe}(\text{CO})_3(\text{CTe})_2$  structures.

|                       | <b>3Te-aT</b> | <b>3Te-e</b> | <b>3Te-a</b> | <b>3Te-eT</b> | <b>3Te-cT</b> | <b>3Te-c</b> | <b>3Te-f</b> |
|-----------------------|---------------|--------------|--------------|---------------|---------------|--------------|--------------|
| $-E$                  | 1696.1194     | 1696.1190    | 1696.1146    | 1696.1061     | 1696.0959     | 1696.0772    | 1696.0589    |
| $\Delta E$            | 0.0           | 0.3          | 3.0          | 8.1           | 14.5          | 26.5         | 38.0         |
| $\langle S \rangle^2$ | 2.04          | 0.00         | 0.00         | 2.04          | 2.03          | 0.00         | 0.00         |

## Supporting Information

### 2.3 Fe(CO)<sub>2</sub>(CE)<sub>2</sub>

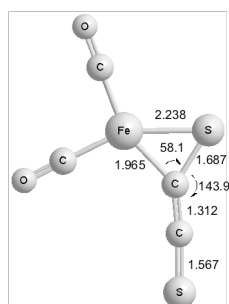

**2S-aT(C<sub>1</sub>, 0.0)**

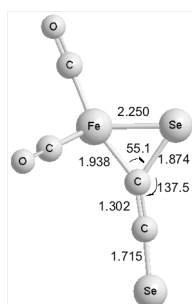

**2Se-aT(C<sub>1</sub>, 0.0)**

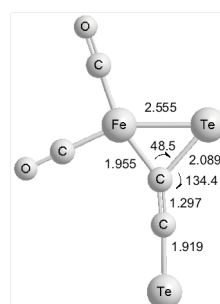

**2Te-aT(C<sub>1</sub>, 1.3)**

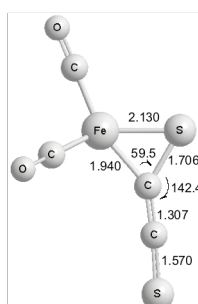

**2S-a(C<sub>1</sub>, 21.0)**

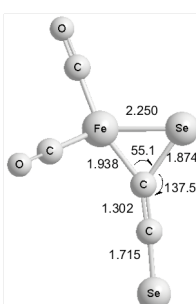

**2Se-a(C<sub>1</sub>, 20.5)**

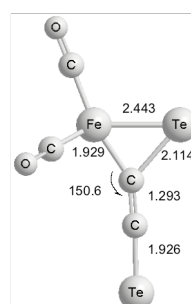

**2Te-a(C<sub>1</sub>, 48.8)**

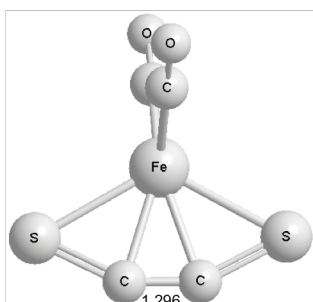

**2S-eT(C<sub>s</sub>, 12.6)**

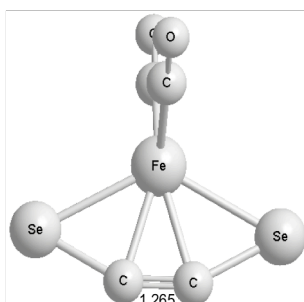

**2Se-eT(C<sub>s</sub>, 5.0)**

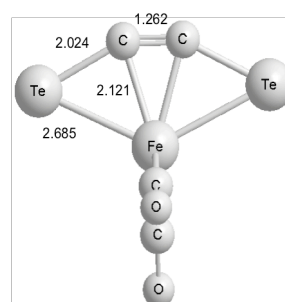

**2Te-eT(C<sub>s</sub>, 0.0)**

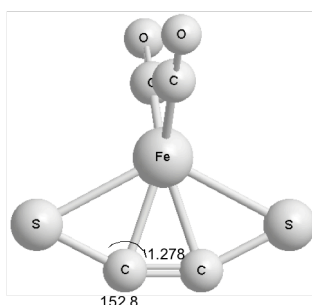

**2S-e(C<sub>2v</sub>, 14.5)**

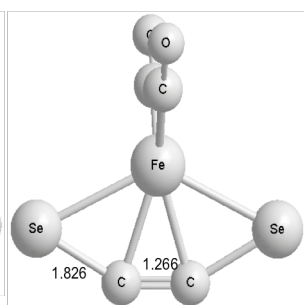

**2Se-e(C<sub>2v</sub>, 7.0)**

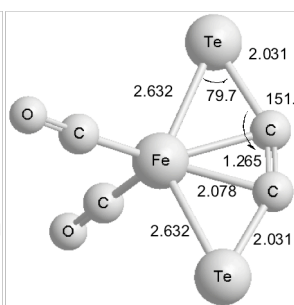

**2Te-e(C<sub>s</sub>, 1.1)**

## Supporting Information

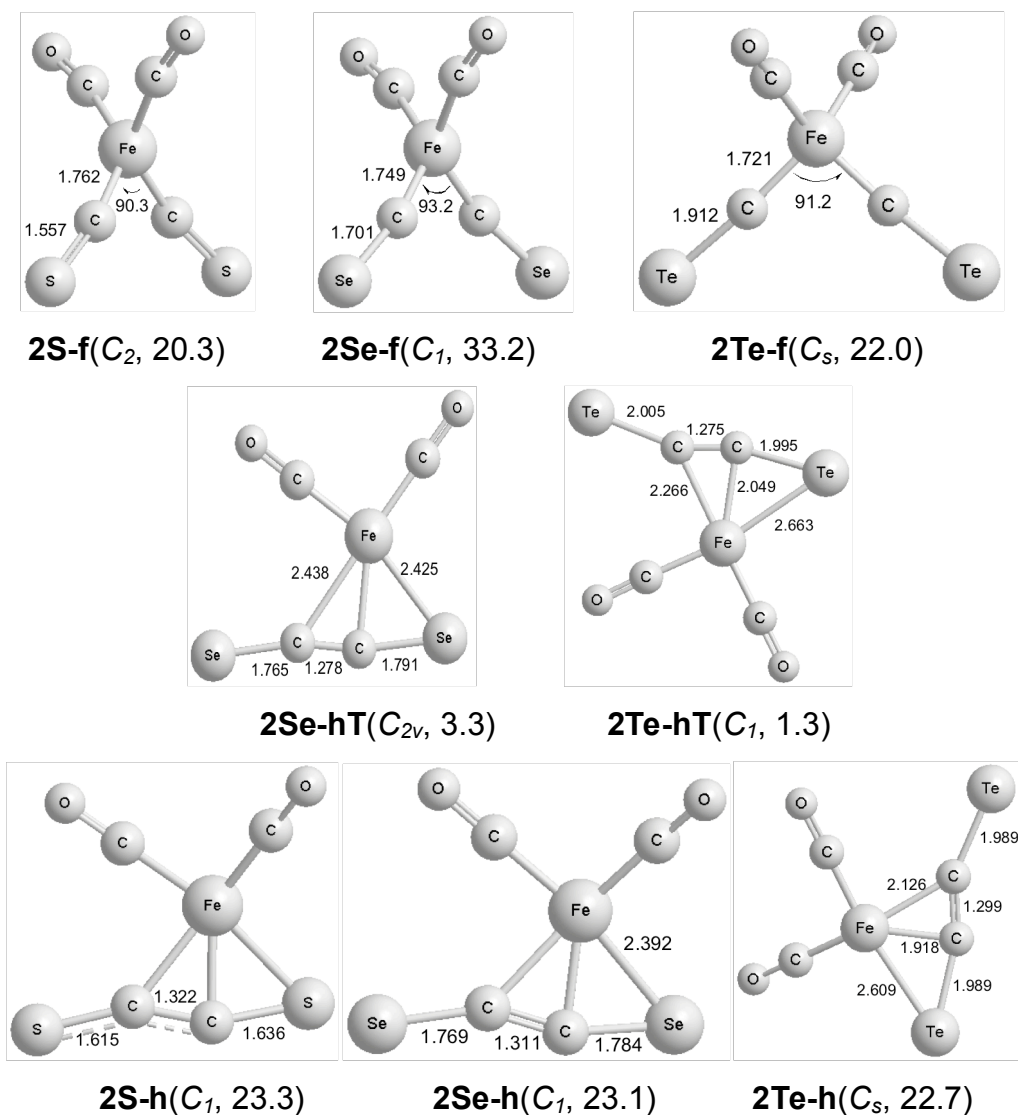

**Figure S3.** Optimized  $\text{Fe}(\text{CO})_2(\text{CE})_2$  ( $E = \text{S, Se, Te}$ ) structures.

**Table S7.** The total energies ( $E$ , in Hartree), relative energies ( $\Delta E$ , in kcal/mol), and spin contamination ( $\langle S^2 \rangle$ ) for the optimized  $\text{Fe}(\text{CO})_2(\text{CS})_2$  structures.

|                       | <b>2S-aT</b> | <b>2S-eT</b> | <b>2S-e</b> | <b>2S-f</b> | <b>2S-a</b> | <b>2S-h</b> |
|-----------------------|--------------|--------------|-------------|-------------|-------------|-------------|
| $-E$                  | 2363.0425    | 2363.0225    | 2363.0194   | 2363.0101   | 2363.0091   | 2363.0053   |
| $\Delta E$            | 0.0          | 12.6         | 14.5        | 20.3        | 21.0        | 23.3        |
| $\langle S^2 \rangle$ | 2.07         | 2.22         | 0.00        | 0.00        | 0.00        | 0.00        |

**Table S8.** The total energies ( $E$ , in Hartree), relative energies ( $\Delta E$ , in kcal/mol), and spin contamination ( $\langle S^2 \rangle$ ) for the optimized  $\text{Fe}(\text{CO})_2(\text{CSe})_2$  structures.

|                       | <b>2Se-aT</b> | <b>2Se-hT</b> | <b>2Se-eT</b> | <b>2Se-e</b> | <b>2Se-a</b> | <b>2Se-h</b> | <b>2Se-f</b> |
|-----------------------|---------------|---------------|---------------|--------------|--------------|--------------|--------------|
| $-E$                  | 6369.7301     | 6369.7249     | 6369.7221     | 6369.7189    | 6369.6975    | 6369.6932    | 6369.6771    |
| $\Delta E$            | 0.0           | 3.3           | 5.0           | 7.0          | 20.5         | 23.1         | 33.2         |
| $\langle S^2 \rangle$ | 2.07          | 2.06          | 2.20          | 0.00         | 0.00         | 0.00         | 0.00         |



## Supporting Information

**Table S9.** The total energies ( $E$ , in Hartree), relative energies ( $\Delta E$ , in kcal/mol), and spin contamination ( $\langle S^2 \rangle$ ) for the optimized  $\text{Fe}(\text{CO})_2(\text{CTe})_2$  structures.

|                       | 2Te-aT    | 2Te-a     | 2Te-hT    | 2Te-aT    | 2Te-f     | 2Te-h     |
|-----------------------|-----------|-----------|-----------|-----------|-----------|-----------|
| $-E$                  | 1582.7544 | 1582.7527 | 1582.7524 | 1582.7523 | 1582.7193 | 1582.7182 |
| $\Delta E$            | 0.0       | 1.1       | 1.3       | 1.3       | 22.0      | 22.7      |
| $\langle S^2 \rangle$ | 2.23      | 0         | 2.05      | 2.07      | 0         | 0         |

## 2.4 Thermochemistry

**Table S10.** Energies (units in kcal/mol) for dissociation of the mononuclear complexes  $\text{Fe}(\text{CE})_2(\text{CO})_n$  into two mononuclear  $\text{Fe}(\text{CO})_n$  or  $\text{C}_2\text{E}_2$ , for dissociation of one CO group from  $\text{Fe}(\text{CE})_2(\text{CO})_n$ , and for coupling two free CE molecules into  $\text{C}_2\text{E}_2$ .

| Reactions                                                                                                             | Energy |
|-----------------------------------------------------------------------------------------------------------------------|--------|
| $\text{Fe}(\text{CO})_4(\text{C}_2\text{S}_2) \rightarrow \text{Fe}(\text{CO})_4 + \text{C}_2\text{S}_2$ (S)          | 48.6   |
| $\text{Fe}(\text{CO})_4(\text{C}_2\text{S}_2) \rightarrow \text{Fe}(\text{CO})_4 + \text{C}_2\text{S}_2$ (T)          | 33.6   |
| $\text{Fe}(\text{CO})_4(\text{C}_2\text{Se}_2) \rightarrow \text{Fe}(\text{CO})_4 + \text{C}_2\text{Se}_2$ (S)        | 50.6   |
| $\text{Fe}(\text{CO})_4(\text{C}_2\text{Se}_2) \rightarrow \text{Fe}(\text{CO})_4 + \text{C}_2\text{Se}_2$ (T)        | 36.5   |
| $\text{Fe}(\text{CO})_4(\text{C}_2\text{Te}_2) \rightarrow \text{Fe}(\text{CO})_4 + \text{C}_2\text{Te}_2$ (S)        | 50.0   |
| $\text{Fe}(\text{CO})_4(\text{C}_2\text{Te}_2) \rightarrow \text{Fe}(\text{CO})_4 + \text{C}_2\text{Te}_2$ (T)        | 36.9   |
| $\text{Fe}(\text{CO})_3(\text{C}_2\text{S}_2) \rightarrow \text{Fe}(\text{CO})_3 + \text{C}_2\text{S}_2$ (S)          | 74.7   |
| $\text{Fe}(\text{CO})_3(\text{C}_2\text{S}_2) \rightarrow \text{Fe}(\text{CO})_3 + \text{C}_2\text{S}_2$ (T)          | 59.7   |
| $\text{Fe}(\text{CO})_3(\text{C}_2\text{Se}_2) \rightarrow \text{Fe}(\text{CO})_3 + \text{C}_2\text{Se}_2$ (S)        | 75.3   |
| $\text{Fe}(\text{CO})_3(\text{C}_2\text{Se}_2) \rightarrow \text{Fe}(\text{CO})_3 + \text{C}_2\text{Se}_2$ (T)        | 61.2   |
| $\text{Fe}(\text{CO})_3(\text{C}_2\text{Te}_2) \rightarrow \text{Fe}(\text{CO})_3 + \text{C}_2\text{Te}_2$ (S)        | 73.8   |
| $\text{Fe}(\text{CO})_3(\text{C}_2\text{Te}_2) \rightarrow \text{Fe}(\text{CO})_3 + \text{C}_2\text{Te}_2$ (T)        | 60.7   |
| $\text{Fe}(\text{CO})_4(\text{C}_2\text{S}_2) \rightarrow \text{Fe}(\text{CO})_3(\text{C}_2\text{S}_2) + \text{CO}$   | 9.1    |
| $\text{Fe}(\text{CO})_4(\text{C}_2\text{Se}_2) \rightarrow \text{Fe}(\text{CO})_3(\text{C}_2\text{Se}_2) + \text{CO}$ | 10.5   |
| $\text{Fe}(\text{CO})_4(\text{C}_2\text{Te}_2) \rightarrow \text{Fe}(\text{CO})_3(\text{C}_2\text{Te}_2) + \text{CO}$ | 11.4   |
| $\text{Fe}(\text{CO})_3(\text{C}_2\text{S}_2) \rightarrow \text{Fe}(\text{CO})_2(\text{C}_2\text{S}_2) + \text{CO}$   | 13.6   |
| $\text{Fe}(\text{CO})_3(\text{C}_2\text{Se}_2) \rightarrow \text{Fe}(\text{CO})_2(\text{C}_2\text{Se}_2) + \text{CO}$ | 13.9   |
| $\text{Fe}(\text{CO})_3(\text{C}_2\text{Te}_2) \rightarrow \text{Fe}(\text{CO})_2(\text{C}_2\text{Te}_2) + \text{CO}$ | 13.9   |
| $2\text{CS} \rightarrow \text{C}_2\text{S}_2$ (S)                                                                     | -46.4  |
| $2\text{CS} \rightarrow \text{C}_2\text{S}_2$ (T)                                                                     | -61.4  |
| $2\text{CSe} \rightarrow \text{C}_2\text{Se}_2$ (S)                                                                   | -64.3  |
| $2\text{CSe} \rightarrow \text{C}_2\text{Se}_2$ (T)                                                                   | -78.4  |
| $2\text{CTe} \rightarrow \text{C}_2\text{Te}_2$ (S)                                                                   | -99.6  |
| $2\text{CTe} \rightarrow \text{C}_2\text{Te}_2$ (T)                                                                   | -112.7 |

## Supporting Information

### 2.5 Orbital Interactions

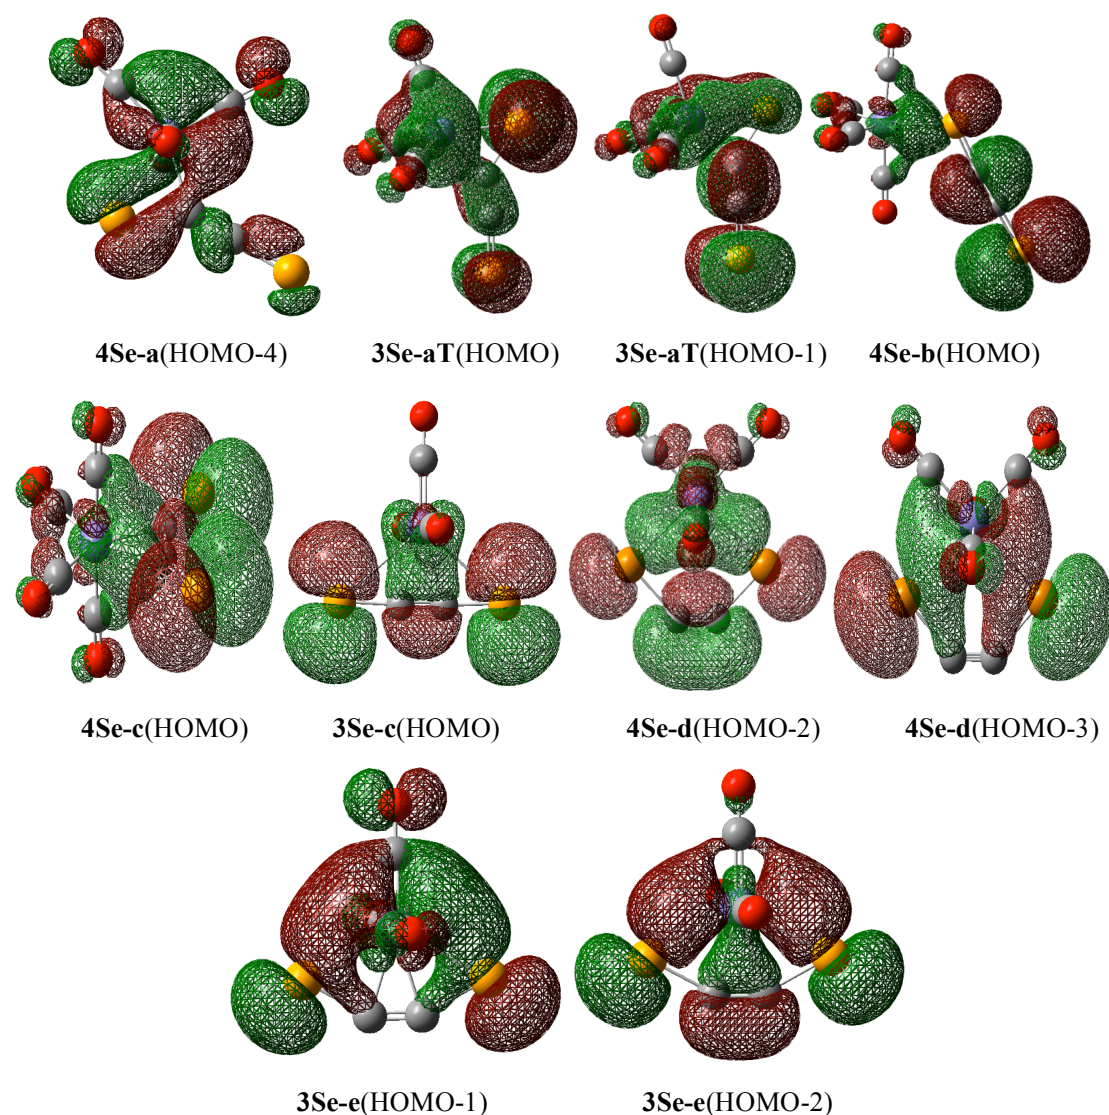

**Fig. S4.** Selective orbitals for different modes of Se containing systems.

- (1) Ehlers, A. W.; Frenking, G. *J. Am. Chem. Soc.* **1994**, *116*, 1514.
- (2) Delley, B.; Wrinn, M.; Lüthi, H. P. *J. Chem. Phys.* **1994**, *100*, 5785.
- (3) Li, J.; Schreckenbach, G.; Ziegler, T. *J. Am. Chem. Soc.* **1995**, *117*, 486.
- (4) Jonas, V.; Thiel, W. *J. Chem. Phys.* **1995**, *102*, 8474.
- (5) Barckholtz, T. A.; Bursten, B. E. *J. Am. Chem. Soc.* **1998**, *120*, 1926.
- (6) Jemmis E. D.; Giju, K. T. *J. Am. Chem. Soc.*, **1998**, *120*, 6952.
- (7) Niu, S.; Hall, M. B. *Chem. Rev.* **2000**, *100*, 353.
- (8) Cotton, F. A.; Gruhn, N. E.; Gu, J.; Huang, P.; Lichtenberger, D. L.; Murillo, C. A.; Van Dorn, L. O.; Wilkinson, C. C. *Science* **2002**, *298*, 1971.
- (9) Macchi, P.; Sironi, A. *Coord. Chem. Rev.* **2003**, *238*, 383.
- (10) Siegbahn, P. E. M. *J. Am. Chem. Soc.* **2005**, *127*, 17303.
- (11) Ziegler T.; Autschbach, J. *Chem. Rev.* **2005**, *105*, 2695.

## Supporting Information

---

- (12) Mota, A. J.; Dedieu, A.; Bour, C.; Suffert, J. *J. Am. Chem. Soc.* **2005**, *127*, 7171.
- (13) Bühl, M.; Kabrede, H. *J. Chem. Theory Comput.* **2006**, *2*, 1282.
- (14) Brynda, M.; Gagliardi, L.; Widmark, P. O.; Power, P. P.; Roos, B. O. *Angew. Chem. Int. Ed.* **2006**, *45*, 3804.
- (15) Zhao Y.; Truhlar, D. G. *J. Chem. Phys.* **2006**, *124*, 224105.
- (16) Strickland N. S.; Harvey, J. N. *J. Phys. Chem. B* **2007**, *111*, 841.
- (17) Becke, A. D. *J. Chem. Phys.* **1993**, *98*, 5648.
- (18) Lee, C.; Yang, W.; Parr, R. G. *Phys. Rev. B* **1988**, *37*, 785.
- (19) Dunning, T. H. *J. Chem. Phys.* **1970**, *53*, 2823.
- (20) Dunning, T. H.; Hay, P. J. *Methods of Electronic Structure Theory*; Schaefer, H. F., Ed.; Plenum: New York, 1977; pp 1–27.
- (21) Huzinaga, S. *J. Chem. Phys.* **1965**, *42*, 1293.
- (22) Schafer, A.; Horn, H.; Ahlrichs, R. *J. Chem. Phys.* **1992**, *97*, 2571.
- (23) Wachters, A. J. H. *J. Chem. Phys.* **1970**, *52*, 1033.
- (24) Hood, D. M.; Pitzer, R. M.; Schaefer, H. F. *J. Chem. Phys.* **1979**, *71*, 705.
- (25) Hay, P. J.; Wadt, W. R. *J. Chem. Phys.* **1985**, *82*, 284.
- (26) Hay, P. J.; Wadt, W. R. *J. Chem. Phys.* **1985**, *82*, 299.
- (27) Gaussian 09, Revision B.01, Frisch, M. J.; Trucks, G. W.; Schlegel, H. B.; Scuseria, G. E.; Robb, M. A.; Cheeseman, J. R.; Scalmani, G.; Barone, V.; Mennucci, B.; Petersson, G. A.; Nakatsuji, H.; Caricato, M.; Li, X.; Hratchian, H. P.; Izmaylov, A. F.; Bloino, J.; Zheng, G.; Sonnenberg, J. L.; Hada, M.; Ehara, M.; Toyota, K.; Fukuda, R.; Hasegawa, J.; Ishida, M.; Nakajima, T.; Honda, Y.; Kitao, O.; Nakai, H.; Vreven, T.; Montgomery, J. A.; Peralta, Jr., J. E.; Ogliaro, F.; Bearpark, M.; Heyd, J. J.; Brothers, E.; Kudin, K. N.; Staroverov, V. N.; Keith, T.; Kobayashi, R.; Normand, J.; Raghavachari, K.; Rendell, A.; Burant, J. C.; Iyengar, S. S.; Tomasi, J.; Cossi, M.; Rega, N.; Millam, J. M.; Klene, M.; Knox, J. E.; Cross, J. B.; Bakken, V.; Adamo, C.; Jaramillo, J.; Gomperts, R.; Stratmann, R. E.; Yazyev, O.; Austin, A. J.; Cammi, R.; Pomelli, C.; Ochterski, J. W.; Martin, R. L.; Morokuma, K.; Zakrzewski, V. G.; Voth, G. A.; Salvador, P.; Dannenberg, J. J.; Dapprich, S.; Daniels, A. D.; Farkas, O.; Foresman, J. B.; Ortiz, J. V.; Cioslowski, J.; Fox, D. J. Gaussian, Inc., Wallingford CT, **2010**.
- (28) Papas, B. N.; Schaefer, H. F. *J. Mol. Struct.* **2006**, *768*, 175.
